# Supplementary material
Source: publisher site journal article supplement (http://kjim.org/upload/media/kjim-2019-308-suppl1.pdf)
Supplement: Supplementary file 1 [file kjim-2019-308-suppl1.pdf]

**Supplementary Table 1. General and clinical characteristics of the study population**

| Characteristic         | Diltiazem (n = 1,253) | Amlodipine (n = 176) | Nifedipine (n = 92) | Benidipine (n = 65) | p value <sup>a</sup> |
|------------------------|-----------------------|----------------------|---------------------|---------------------|----------------------|
| Age, yr                | 54.93 ± 11.15         | 57.03 ± 10.80        | 54.84 ± 10.26       | 53.66 ± 10.11       | 0.076                |
| BMI, kg/m <sup>2</sup> | 29.38 ± 101.12        | 24.96 ± 3.18         | 24.62 ± 3.29        | 24.65 ± 2.99        | 0.882                |
| DBP, mmHg              | 127.19 ± 36.04        | 130.86 ± 18.96       | 125.88 ± 18.55      | 124.02 ± 15.78      | 0.208                |
| SBP, mmHg              | 76.96 ± 12.39         | 78.68 ± 12.39        | 78.79 ± 12.11       | 76.80 ± 10.96       | 0.417                |
| TC, mg/dL              | 175.73 ± 36.05        | 171.09 ± 37.97       | 173.68 ± 34.50      | 177.67 ± 41.21      | 0.446                |
| TG, mg/dL              | 143.80 ± 103.25       | 150.92 ± 104.90      | 144.38 ± 124.88     | 133.11 ± 108.10     | 0.738                |
| HDL-C, mg/dL           | 46.83 ± 13.11         | 45.57 ± 10.72        | 46.69 ± 11.21       | 49.15 ± 12.51       | 0.342                |
| LDL-C, mg/dL           | 104.98 ± 31.52        | 99.19 ± 32.75        | 101.03 ± 31.81      | 106.16 ± 33.45      | 0.151                |
| hsCRP, mg/dL           | 1.11 ± 8.22           | 0.42 ± 0.92          | 0.30 ± 0.63         | 0.18 ± 0.37         | 0.530                |
| CKMB, ng/mL            | 6.31 ± 27.07          | 5.19 ± 12.61         | 9.78 ± 22.31        | 2.19 ± 1.81         | 0.426                |
| Troponin-I, ng/mL      | 0.62 ± 5.06           | 0.33 ± 2.01          | 1.24 ± 4.80         | 0.03 ± 0.10         | 0.596                |
| LVEF, %                | 64.50 ± 6.18          | 64.58 ± 6.53         | 65.68 ± 7.27        | 62.58 ± 8.44        | 0.041                |
| Male sex               | 767 (61.21)           | 123 (69.89)          | 59 (64.13)          | 47 (72.31)          | 0.052                |
| Smoking                | 355 (28.74)           | 46 (26.29)           | 34 (36.96)          | 11 (16.92)          | 0.047                |
| HTN                    | 436 (34.82)           | 97 (55.11)           | 44 (47.83)          | 24 (36.92)          | 0.000                |
| DM                     | 115 (9.19)            | 14 (8)               | 9 (9.78)            | 3 (4.62)            | 0.602                |
| Dyslipidemia           | 213 (17.03)           | 32 (18.29)           | 20 (21.74)          | 9 (13.85)           | 0.574                |
| CHD                    | 137 (10.94)           | 27 (15.43)           | 17 (18.48)          | 13 (20)             | 0.014                |
| PCI                    | 29 (2.31)             | 3 (1.7)              | 2 (2.17)            | 1 (1.54)            | 0.939                |
| Definite spasm         | 479 (38.23)           | 66 (37.5)            | 52 (56.52)          | 24 (36.92)          | 0.006                |
| Atherosclerosis > 50%  | 100 (7.98)            | 15 (8.52)            | 6 (6.52)            | 1 (1.54)            | 0.266                |

Values are presented as mean ± SD or number (%).

CCB, calcium channel blocker; BMI, body mass index; DBP, diastolic blood pressure; SBP, systolic blood pressure; TC, total cholesterol; TG, triglyceride; HDL-C, high density lipoprotein cholesterol; LDL-C, low density lipoprotein cholesterol; hsCRP, high-sensitive C-reactive protein; CKMB, creatinine kinase-MB; LVEF, left ventricular ejection fraction; HTN, hypertension; DM, diabetes mellitus; CHD, coronary heart disease; PCI, percutaneous coronary intervention.

<sup>a</sup>p values were calculated by analysis of variance for continuous variables and calculated by chi-square for categorical variables.
